# Supplementary material
Source: Springer Nature journal article supplement (https://www.springermedizin.de/resource/supplementary/13058_2013_3261_MOESM1_ESM.pdf/9703714)
Supplement: MOESM1 [file 9703714]

## Gap Analysis Working Groups (WG)

Internationally recognised scientists/clinicians /healthcare professionals based in the UK and Ireland

9 main areas covered

Genetics  
epidemiology  
epigenetics

Risk and  
prevention

Molecular  
pathology,  
cell biology

Invasion,  
metastasis,  
angiogenesis  
stem cells

Endocrine  
influences,  
therapy  
resistance

Current  
clinical  
therapies

Targeted  
therapies,  
preclinical,  
biomarkers,  
CTC/DTC

Imaging,  
detection  
screening

Living with  
& managing  
breast cancer

What are the key gaps?  
How could these be addressed?  
What would the implications be?

### Working Group Actions

Pre-meeting  
questionnaire

Workshops,  
presentations,  
discussions

Reports  
summarising  
discussions  
and literature

Group reports  
editing  
sign-off

### Editorial Board

Working Group Leaders;  
Co-chairs; Breast Cancer  
Campaign secretariat

### Executive Advisory Board

International breast cancer  
experts+ patient advocates

### Co-chairs

Draft document  
Iterative cycles of  
review and revision  
Consultation with WGs

Gap Analysis review
